# Supplementary material for: The circadian regulator Bmal1 in joint mesenchymal cells regulates both joint development and inflammatory arthritis
Source: PubMed Central journal article supplement (PMC6322248; doi:10.1186/s13075-018-1770-1), 2019-01-06
Supplement: 13075_2018_1770_MOESM1_ESM.pdf [file 13075_2018_1770_MOESM1_ESM.pdf]

**Supplementary Figure 1:** (A) Bioluminescence recording from lung fibroblasts cultured from *Col6a1-Bmal1<sup>-/-</sup>* and wildtype animals on a *PER2::luc* background. (B) QPCR analysis of *Col6a1* and *Bmal1* expression in Peyer's patches isolated from wildtype (n=5) and *Col6a1-Bmal1<sup>-/-</sup>* (n=3) animals.

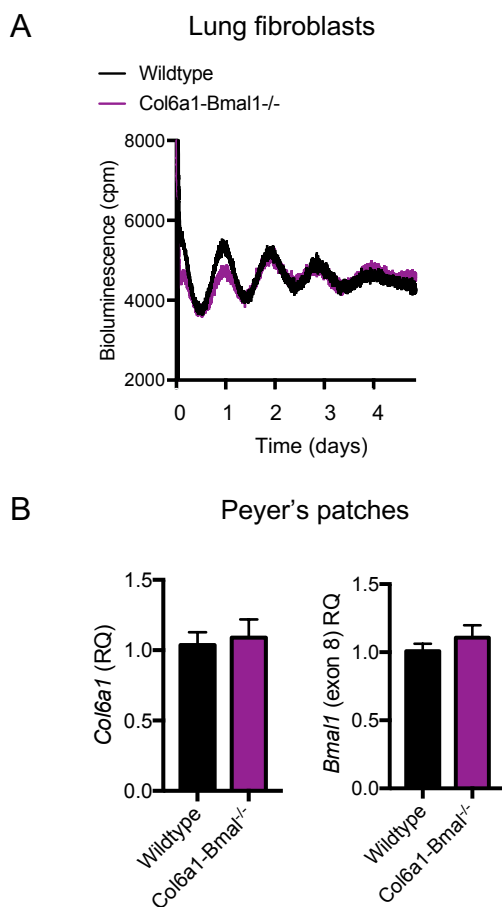

**Supplementary Figure 2:** (A) Hind paw thickness (mm) plotted against animal weight (g) measured in female (top) and male (bottom) *Col6a1-Bmal1<sup>-/-</sup>* and WT mice (pooled data shown in Figure 2a). (B) X-rays of hind limbs from *Col6a1-Bmal1<sup>-/-</sup>* mice and WT littermates age 3 and 6 months, representative of n=3 animals/genotype. Arrow indicates location of a calcaneal spur. (C) X-ray images of the tails of *Col6a1-Bmal1<sup>-/-</sup>* mice and WT littermates age 3, 6 and 9 months, arrows indicate areas of calcification within the intervertebral disks. (D) Pixel intensity in a defined region of interest encompassing the intervertebral disk space was quantified in 9 month old mice, n=3/genotype.

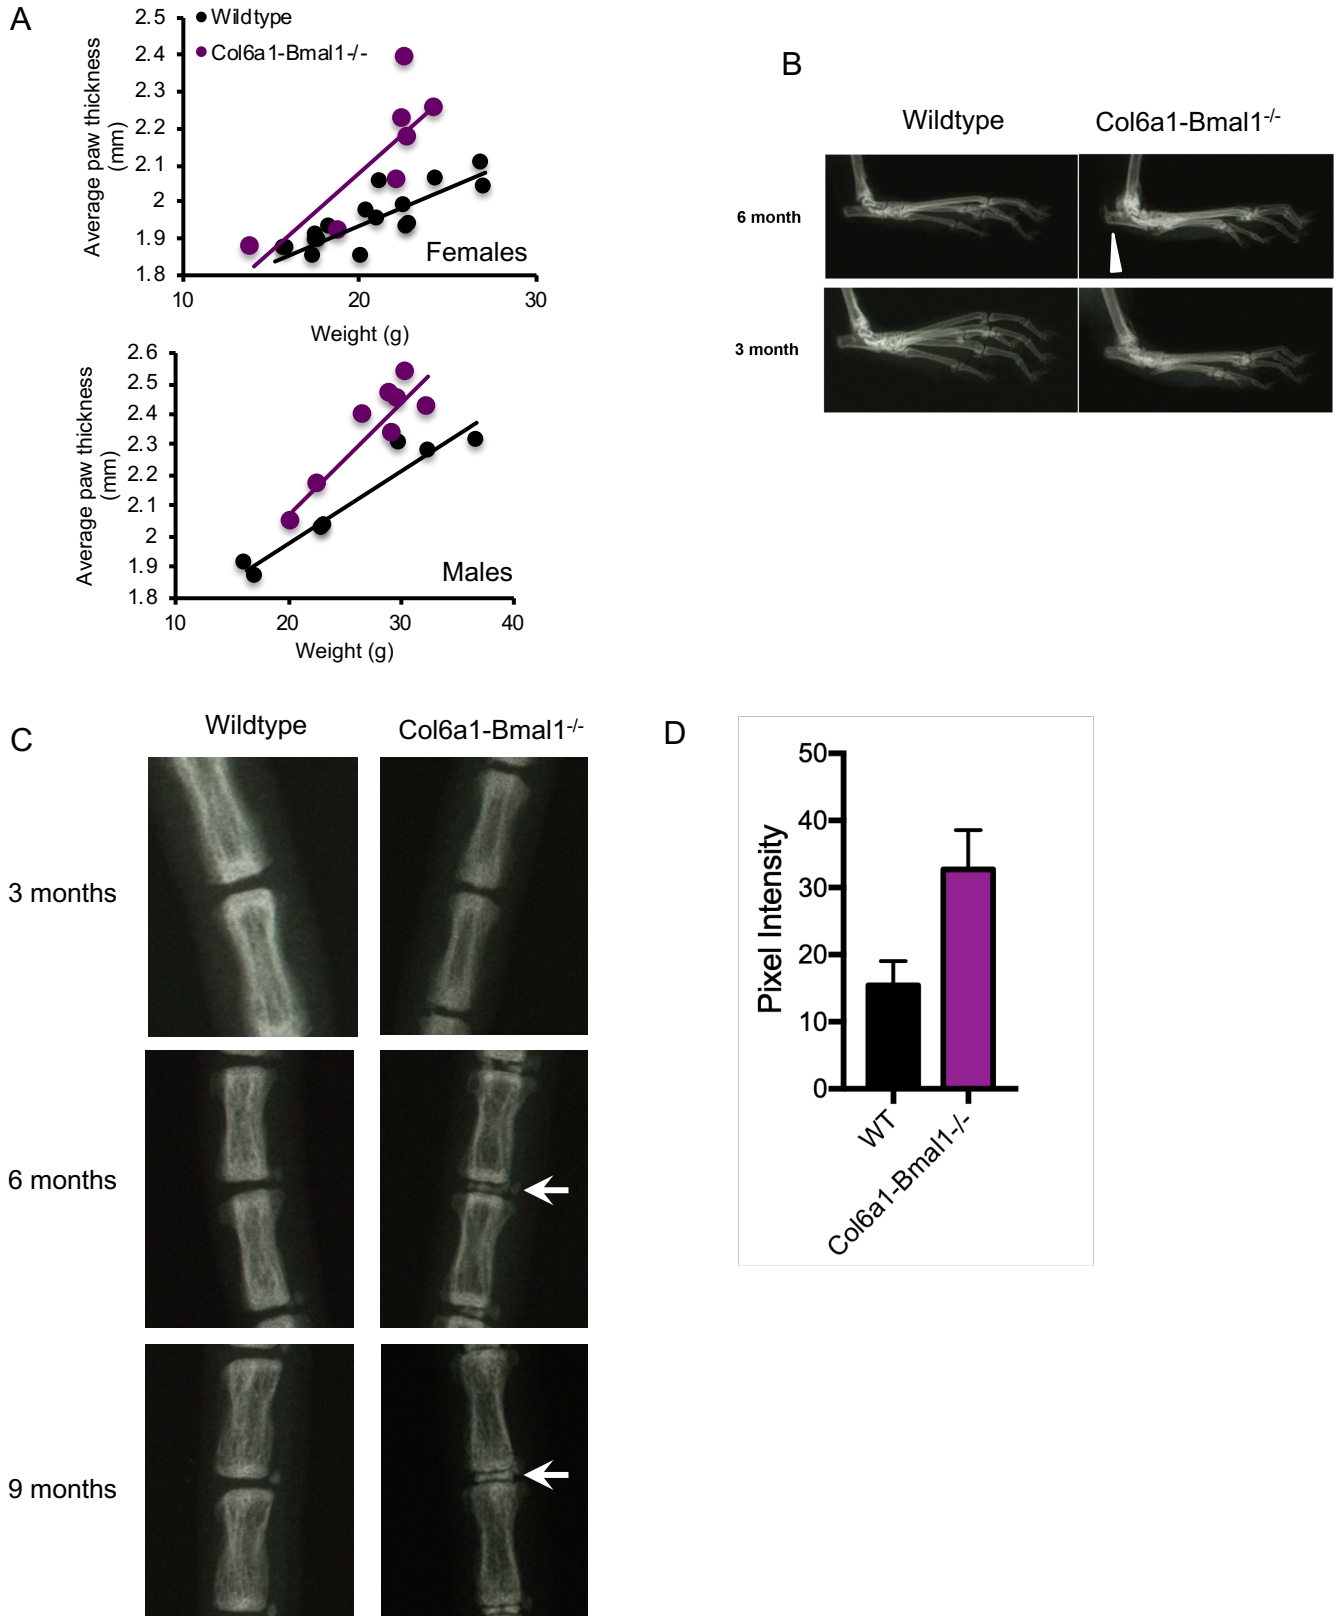

**Supplementary Figure 3:** (A) Comparison of paw thickness in male wildtype ( $Bmal1^{+/+}$ , n=9) and KO ( $Bmal1^{-/-}$ , n=5) mice. Paw thickness (mm) and weights (g) are plotted against one another. (B) X-rays of hind limbs from male  $Bmal1^{-/-}$  and wildtype littermates, age 4-5 months. A spur protruding from the calcaneum of the  $Bmal1^{-/-}$  is marked by an arrow, representative of n=3-4 animals/genotype. (C) Quantification of pixel intensity from X-ray images in a region of interest superior to the calcaneus, n=6-8 limbs, unpaired T test.

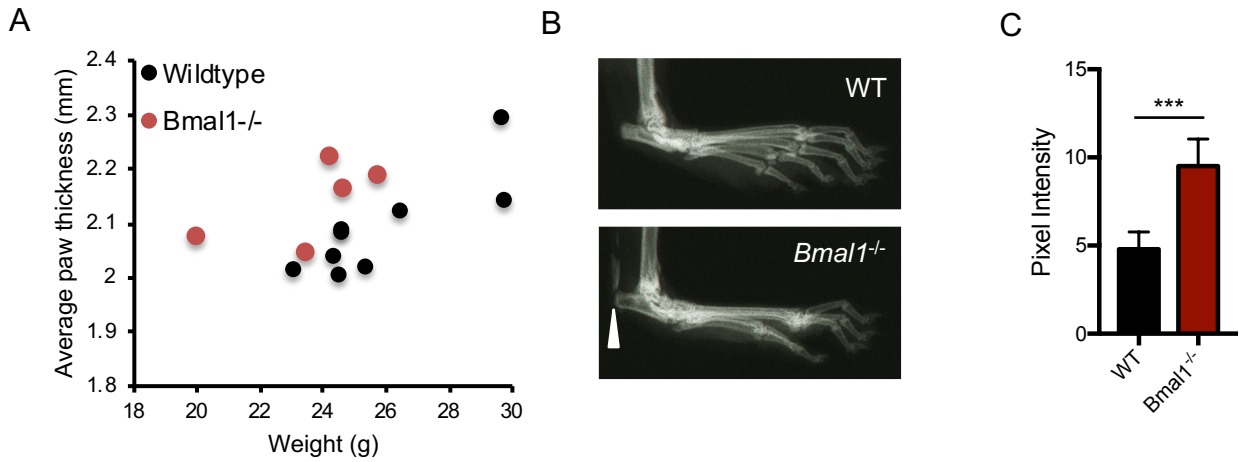

**Supplementary Figure 4:** Gating strategy for identification of cells digested from the hind limbs of naïve animals. Single cells were gated as shown below to identify populations of FLS (CD45<sup>-</sup>CD90.2<sup>+</sup>), T cells (CD45<sup>+</sup>CD11b<sup>-</sup>CD3<sup>+</sup>), neutrophils (CD45<sup>+</sup>CD11b<sup>+</sup>Ly6C<sup>+</sup>Ly6G<sup>+</sup>) and MHCII<sup>high</sup> and MHCII<sup>low</sup> macrophages (CD45<sup>+</sup>CD11b<sup>+</sup>Ly6C<sup>+</sup>CD64<sup>+</sup>F4/80<sup>+</sup>)

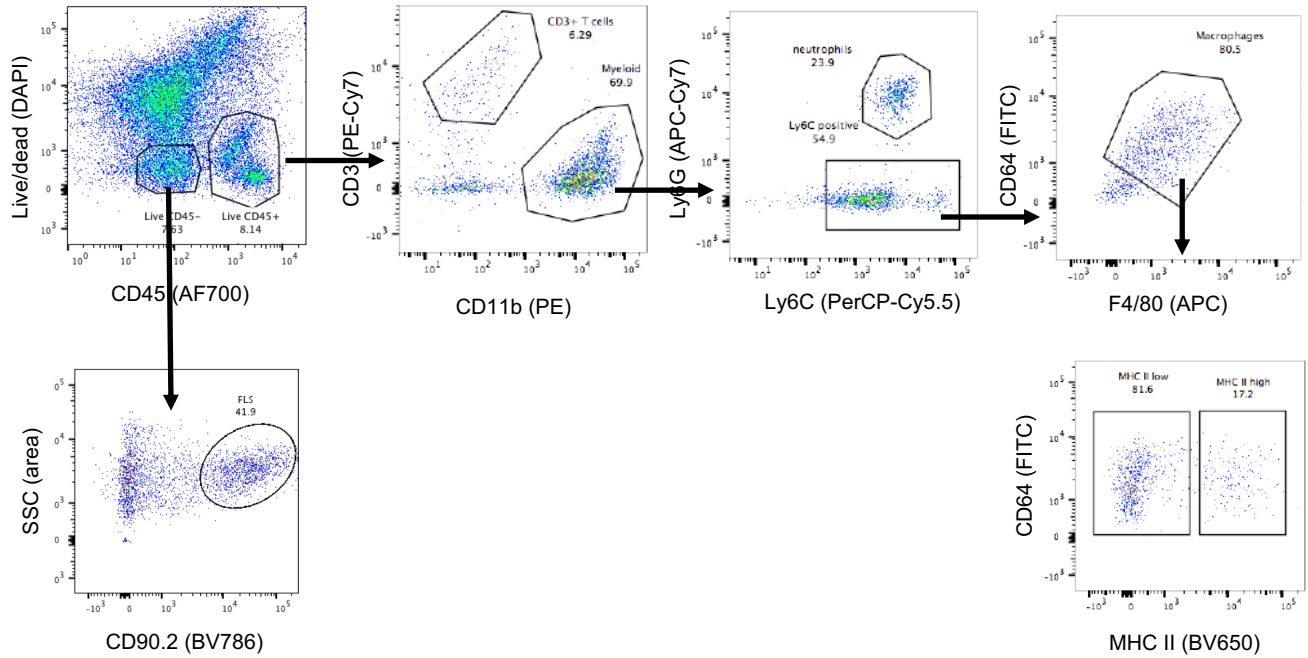

**Supplementary Figure 5:** Gating strategy for identification of cells digested from the hind limbs of arthritic animals. Single cells were gated as shown below to identify populations of neutrophils ( $CD45^+CD11b^+F4/80^-Ly6C^+Ly6G^+$ ) and  $Ly6C^{hi}$  and  $Ly6C^{low}$  monocytes ( $CD45^+CD11b^+F4/80^-Ly6G^-$ ).

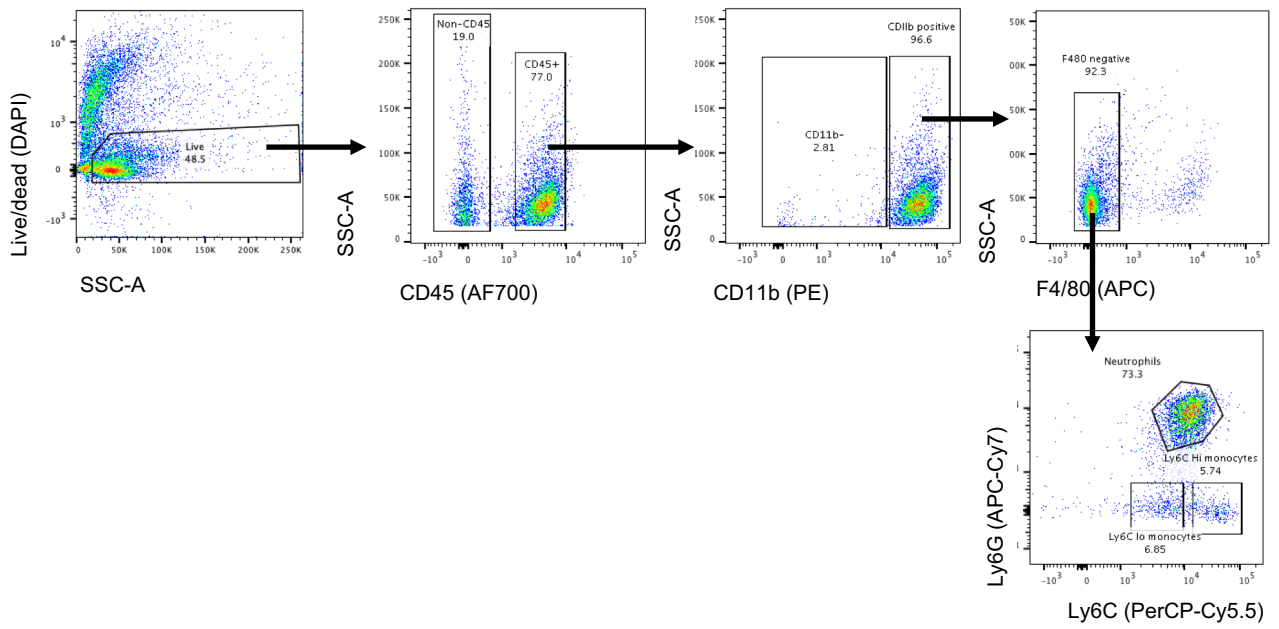

**Supplementary Figure 6:** Expression of BMAL1 is unaffected in macrophages. (A) Expression of *Bmal1* (exon 8) was quantified from peritoneal macrophages harvested from *Col6a1-Bmal1<sup>-/-</sup>* (3 male and 3 female) and wildtype (4 male and 3 female) mice using QPCR, *gapdh* was utilized as a housekeeping gene and levels were normalized to wildtype expression. (B) Western blot of BMAL1 and  $\beta$ -ACTIN protein levels in bone marrow derived macrophages harvested from *Col6a1-Bmal1<sup>-/-</sup>* and wildtype animals. (C) Bioluminescence analysis of PER2::luciferase activity in peritoneal macrophages from *Col6a1-Bmal1<sup>-/-</sup>* mice and wildtype counterparts, representative of n=3-4 males/genotype.

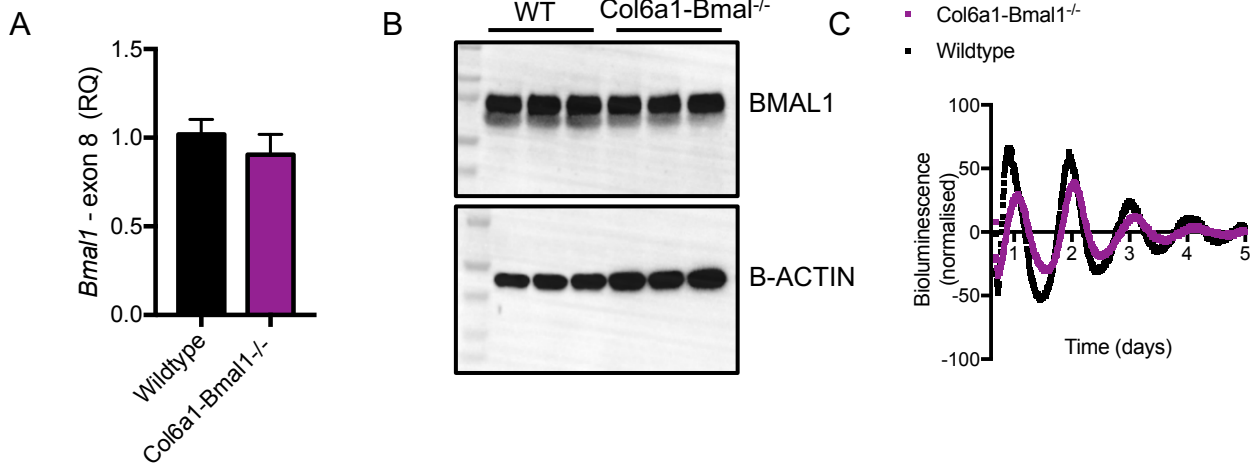

**Supplementary Table 1:** Antibodies utilized for flow cytometric assessment of cells digested from naïve limbs

| <b>Antibody</b> | <b>Fluorophore</b> | <b>Clone</b> | <b>Supplier</b> |
|-----------------|--------------------|--------------|-----------------|
| CD45            | AF700              | 30-F11       | BD Biosciences  |
| CD3             | Pe-Cy7             | 145-2C11     | Biolegend       |
| CD11b           | PE                 | M1/70        | Biolegend       |
| Ly6G            | APC-Cy7            | IA8          | BD Biosciences  |
| Ly6C            | PerCP-Cy5.5        | AL-21        | Biolegend       |
| CD64            | FITC               | XS4-5/7.1    | Biolegend       |
| F4/80           | APC                | BM8          | eBioscience     |
| MHC II          | BV650              | M5/114.15.2  | BD Biosciences  |
| CD90.2          | BV786              | 30-H12       | Biolegend       |

**Supplementary Table 2:** Antibodies utilized for flow cytometric assessment of cells digested from arthritic limbs.

| <b>Antibody</b> | <b>Fluorophore</b> | <b>Clone</b> | <b>Supplier</b> |
|-----------------|--------------------|--------------|-----------------|
| CD45            | AF700              | 30-F11       | BD Biosciences  |
| CD11b           | PE                 | M1/70        | Biolegend       |
| F4/80           | APC                | BM8          | eBiosciences    |
| Ly6G            | APC-Cy7            | IA8          | Biolegend       |
| Ly6C            | PerCP-Cy5.5        | AL-21        | BD Biosciences  |



**Supplementary Table 3:** Primers utilized for QPCR analysis. \*Indicates where TaqMan gene expression assays (ThermoFisher Scientific) were utilized with the relevant product code.

|                       | Forward                  | Reverse                    | Probe (Fam-Tamra)               |
|-----------------------|--------------------------|----------------------------|---------------------------------|
| <i>Gapdh</i>          | CAATGTGTCCGTCGTCGATCT    | GTCCTCAGTGTAGCCCAAGATG     | CGTGCCGCCTGGAGAAACCTGCC         |
| <i>Per2</i>           | GCCTTCAGACTCATGATGACA GA | TTTGTGTGCGTCAGCTTTGG       | ACTGCTCACTACTGCAGCCGCTCGT       |
| <i>Bmal1 (exon 8)</i> | CGTCGGGACAAAATGAACAG     | GAACAGCCATCCTTAGCAC        | TACCAACATGCAATGCAATGTCCAGGAA    |
| <i>Cry1</i>           | CTGGCGTGGAAGTCATCGT      | CTGTCCGCCATTGAGTTCTATG     | CGCATTTCACATACACTGTATGACCTGGACA |
| <i>Dbp</i>            | CCGTGGAGGTGCTAATGACCT    | CCTCTGAGAAGCGGTGCCT        | TGAACCTGATCCGGCTGATCTTGCC       |
| <i>Il6</i>            | CTATACCACTTCACAAGTCGGAGG | TGCACAACCTCTTTTCTCATTTC    | TTAATTACACATGTTCTCTGGGAAATCG    |
| <i>Cxcl1</i>          | CTGCACCCAAACCGAAGTC      | AGCTTCAGGGTCAAGGCAAG       | CACTCAAGAATGGTCGCGAGGC          |
| <i>Ccl2</i>           | TTCTGGGCCTGCTGTTCA       | CCAGCCTACTCATTGGGATCA      | CTCAGCCAGATGCAGTTAACGCCCC       |
| <i>lfn gamma</i>      | TCAAGTGGCATAGATGTGGAAGAA | TGGCTCTGCAGGATTTTCATG      | TCACCATCCTTTTGCCAGTTCCTCCAG     |
| <i>Rankl</i>          | GCACACCTCACCATCAATGCT    | GGTACCAAGAGGACAGAGTGACTTTA | CCAGCATCCCATCGGGTTCCC           |
| <i>Rev-erb α *</i>    | Mm00520708_m1            |                            |                                 |
| <i>Col2a1 *</i>       | Mm01309565_m1            |                            |                                 |
| <i>Col6a1*</i>        | Mm00487160_m1            |                            |                                 |
| <i>Aggrecan *</i>     | Mm00545794_m1            |                            |                                 |
| <i>Prg4 *</i>         | Mm01284582_m1            |                            |                                 |
| <i>Ihh *</i>          | Mm00439613_m1            |                            |                                 |
| <i>Cxcl5 *</i>        | Mm00436451_g1            |                            |                                 |
| <i>Il10 *</i>         | Mm01288386_m1            |                            |                                 |
| <i>Il13 *</i>         | Mm00434204_m1            |                            |                                 |

**Supplementary Table 4:** Cytokine secretion by cultured FLS. Cell supernatants were assayed by Bioplex or ELISA (CXCL5 and M-CSF), n=4-6. Data was analyzed using two way ANOVA and post hoc Bonferroni's test (black asterix) or unpaired T test (grey asterix). Effects of genotype are shown within each treatment group (control and + TNF $\alpha$ ). Secretion of IL1 $\alpha$ , IL1 $\beta$ , IL2, IL3, IL4, IL5, IL12p40, IL17, CCL11, G-CSF and CCL3 were minimal and thus data are not shown.

|                               | Control         |                                     | + TNF $\alpha$      |                                     |
|-------------------------------|-----------------|-------------------------------------|---------------------|-------------------------------------|
|                               | WT (pg/ml)      | Col6a1-Bmal1 <sup>-/-</sup> (pg/ml) | WT (pg/ml)          | Col6a1-Bmal1 <sup>-/-</sup> (pg/ml) |
| <b>IL6</b>                    | 2.3 $\pm$ 0.1   | 3.7 $\pm$ 0.2                       | 13.9 $\pm$ 0.5      | 52.6 $\pm$ 1.2***                   |
| <b>IL9</b>                    | 3.5 $\pm$ 0.9   | 2.4 $\pm$ 0.4                       | 11.2 $\pm$ 0.8      | 6.4 $\pm$ 0.9**                     |
| <b>IL10</b>                   | 1.3 $\pm$ 0.4   | 1.0 $\pm$ 0.3                       | 12.3 $\pm$ 0.6      | 2.7 $\pm$ 0.5***                    |
| <b>IL12 p70</b>               | 5.8 $\pm$ 1.6   | 5.5 $\pm$ 1.3                       | 33.3 $\pm$ 2.3      | 24.1 $\pm$ 0.8**                    |
| <b>IL13</b>                   | ND              | ND                                  | 150.4 $\pm$ 12.1    | 51.7 $\pm$ 7.2***                   |
| <b>GM-CSF</b>                 | ND              | ND                                  | 15.1 $\pm$ 0.8      | 11.2 $\pm$ 0.7**                    |
| <b>IFN<math>\gamma</math></b> | 0.2 $\pm$ 0.06  | 0.2 $\pm$ 0.05                      | 5.8 $\pm$ 0.3       | 1.1 $\pm$ 0.1***                    |
| <b>CXCL1</b>                  | 6.7 $\pm$ 0.7   | 11.7 $\pm$ 0.4                      | 170.7 $\pm$ 19.0    | 716.7 $\pm$ 22.1***                 |
| <b>CCL2</b>                   | 138.0 $\pm$ 6.6 | 303.7 $\pm$ 14.5                    | 1447.7 $\pm$ 194.4  | 7586.9 $\pm$ 298.4***               |
| <b>CCL4</b>                   | 1.3 $\pm$ 0.072 | 3.9 $\pm$ 0.3***                    | 5.2 $\pm$ 0.3       | 11.1 $\pm$ 0.3***                   |
| <b>CCL5</b>                   | 29.4 $\pm$ 2.3  | 29.6 $\pm$ 3.3                      | 387.6 $\pm$ 39.1    | 1574.5 $\pm$ 54.7***                |
| <b>TNF<math>\alpha</math></b> | 7.2 $\pm$ 0.3   | 4.9 $\pm$ 0.2                       | 13777.5 $\pm$ 587.2 | 14762.7 $\pm$ 449.9                 |
| <b>CXCL5</b>                  | 1.1 $\pm$ 0.2   | 32.9 $\pm$ 2.8                      | 22.6 $\pm$ 4.3      | 430.6 $\pm$ 19.1***                 |
| <b>M-CSF</b>                  | ND              | 15.9 $\pm$ 3.0                      | 2.4 $\pm$ 1.0       | 18.5 $\pm$ 6.7*                     |
